# Supplementary material for: Comparison of 2D 4K vs. 3D HD laparoscopic imaging systems in bariatric surgery: study protocol for a randomized controlled prospective trial
Source: Springer Nature journal article supplement (doi:10.1186/s13063-024-07983-4), 2024-02-22

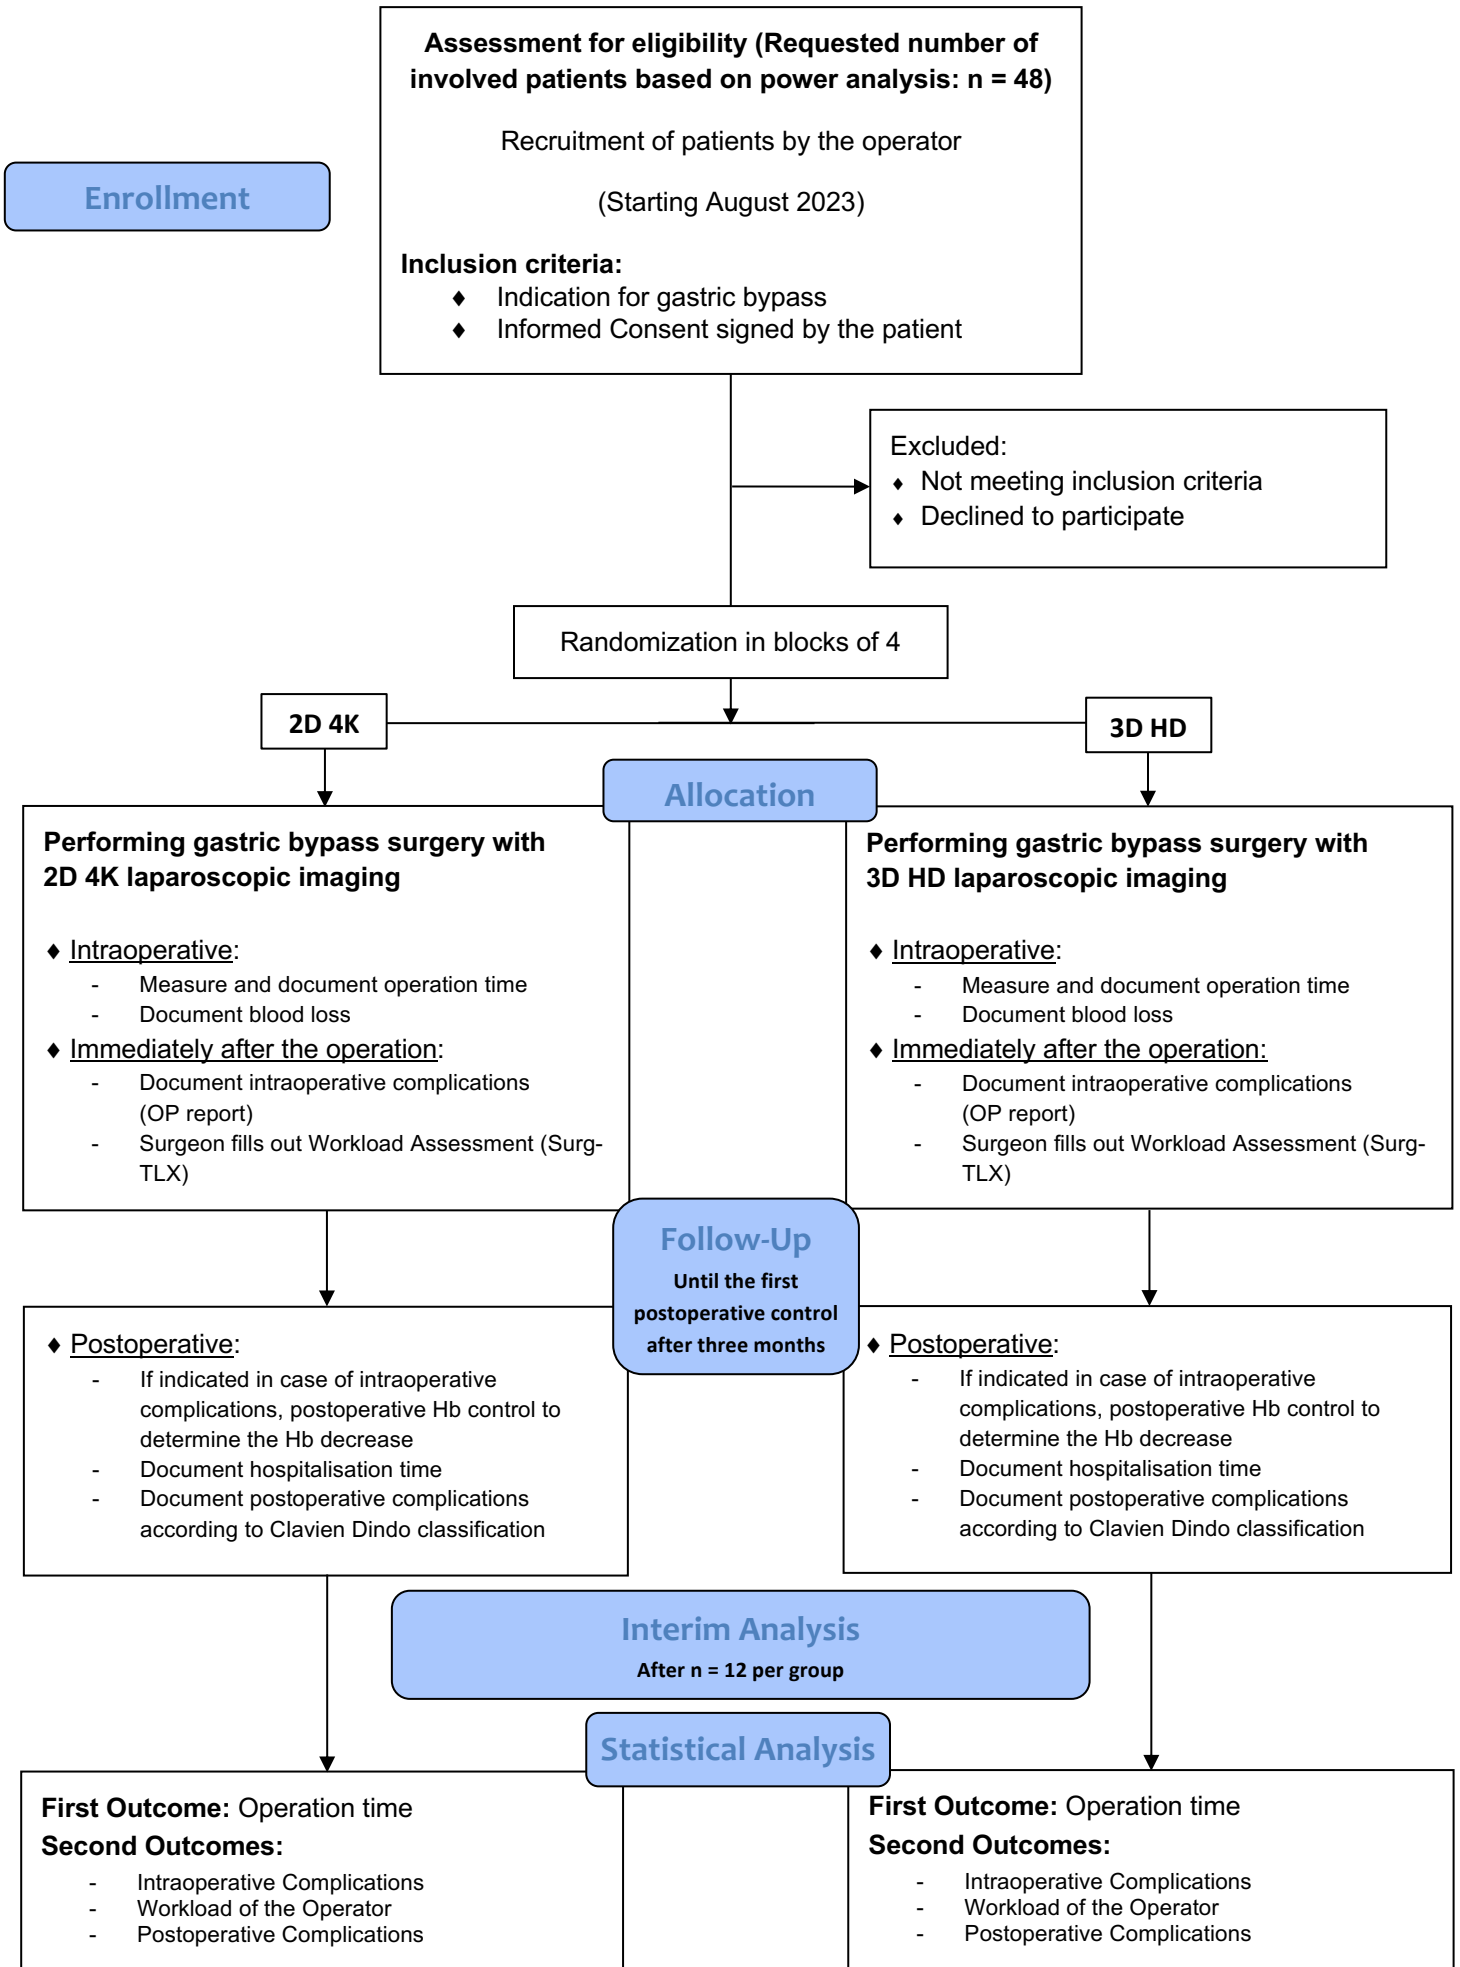

Supplement: MOESM1 [file 26766242]
